# Supplementary material for: Nano-micelles based on a rosin derivative as potent sorbents and sinking agents with high absorption capabilities for the removal of metal ions
Source: Royal Society of Chemistry journal article supplement (doi:10.1039/c2ra20767b), 2012-01-01
Supplement: c2ra20767b.pdf [file c2ra20767b.pdf]

## Electronic Supplementary Information

### Nano-micelles Based on Rosin Derivative as Potent Sorbents and Sinking Agents with High Absorption Capability for Removal of Metal Ions

Wei-Xin Tan,<sup>a,&</sup> Zuan-Tao Lin,<sup>a</sup> & Huai-Tian Bu,<sup>b</sup> Yanan Tian,<sup>c</sup> and Gang-Biao Jiang<sup>a\*</sup>

<sup>a</sup>*Department of Pharmaceutical Engineering, South China Agricultural University, Guangzhou 510642, China.*

<sup>b</sup>*SINTEF Materials and Chemistry, PO Box 124 Blindern, N-0314 Oslo, Norway*

<sup>c</sup>*Department of Veterinary Physiology and Pharmacology, Mail Stop 4466, Texas A&M University, College Station, TX 77843, USA.*

*\*Corresponding author (E-mail: jgb3h@163.com. Tel: +86 20 85280293; Fax: +86 20 85280292)*

*&These authors contributed equally to this work.*

**Table S1.** Assignment of main spectral peaks based on their energies (BE) and related content (RC) for original TEPA-MPA and TEPA-MPA after adsorption of metal ions.

| Element | Original TEPA-MPA |        | TEPA-MPA after adsorption of Ni( II ) |        | TEPA-MPA after adsorption of Cu( II ) |        | TEPA-MPA after adsorption of Cr(III) |        | assignments                   |
|---------|-------------------|--------|---------------------------------------|--------|---------------------------------------|--------|--------------------------------------|--------|-------------------------------|
|         | BE (eV)           | RC (%) | BE (eV)                               | RC (%) | BE (eV)                               | RC (%) | BE (eV)                              | RC (%) |                               |
| N 1s    | 398.89            | 64.15  | 399.99                                | 75.63  | 400.32                                | 87.80  | 399.95                               | 59.08  | -NH <sub>2</sub> , -NH        |
| N 1s    | 400.95            | 35.85  | 401.05                                | 24.37  | 401.72                                | 12.20  | 401.75                               | 40.92  | -NH <sub>3</sub> <sup>+</sup> |
| C 1s    | 282.80            | 46.50  | 284.79                                | 62.52  | 284.81                                | 62.52  | 284.80                               | 69.87  | C-C                           |
| C 1s    | 285.61            | 43.78  | 285.80                                | 28.87  | 286.03                                | 22.90  | 286.16                               | 18.78  | C-N, C-O                      |
| C 1s    | 287.48            | 10.71  | 288.19                                | 8.61   | 288.53                                | 7.01   | 288.46                               | 11.35  | C=O                           |
| O 1s    | 530.78            | 45.95  | 532.24                                | 64.22  | 532.21                                | 59.00  | 532.20                               | 66.32  | C=O                           |
| O 1s    | 531.94            | 54.05  | 533.29                                | 35.78  | 533.11                                | 41.00  | 533.50                               | 33.68  | C-O                           |
